# Supplementary material for: Increased internalization of complement inhibitor CD59 may contribute to endothelial inflammation in obstructive sleep apnea
Source: PubMed Central journal article supplement (PMC5485919; doi:10.1126/scitranslmed.aad0634), 2016-01-06
Supplement: NIHMS867684-supplement-supplement.pdf [file NIHMS867684-supplement-supplement.pdf]

## Supplementary Materials for

### **Increased internalization of complement inhibitor CD59 may contribute to endothelial inflammation in obstructive sleep apnea**

Memet Emin, Gang Wang, Francesco Castagna, Josanna Rodriguez-Lopez, Romina Wahab, Jing Wang, Tessa Adams, Ying Wei, Sanja Jelic\*

\*Corresponding author. E-mail: sj366@cumc.columbia.edu

Published 6 January 2016, *Sci. Transl. Med.* **8**, 320ra1 (2016)  
DOI: 10.1126/scitranslmed.aad0634

#### **The PDF file includes:**

- Fig. S1. Expression of CD59 in leukocytes and platelets.
- Fig. S2. Linear regression analysis.
- Fig. S3. Endocytosis of CD59 with transferrin.
- Fig. S4. Confirmation of HUVEC transfection with CD59 siRNA.
- Fig. S5. Cholesterol biosynthesis in IH.
- Table S1. Baseline characteristics of patients with OSA and control subjects.
- Table S2. Phages isolated after panning without target cells and with bovine serum albumin in polystyrene wells.

## Supplementary Materials

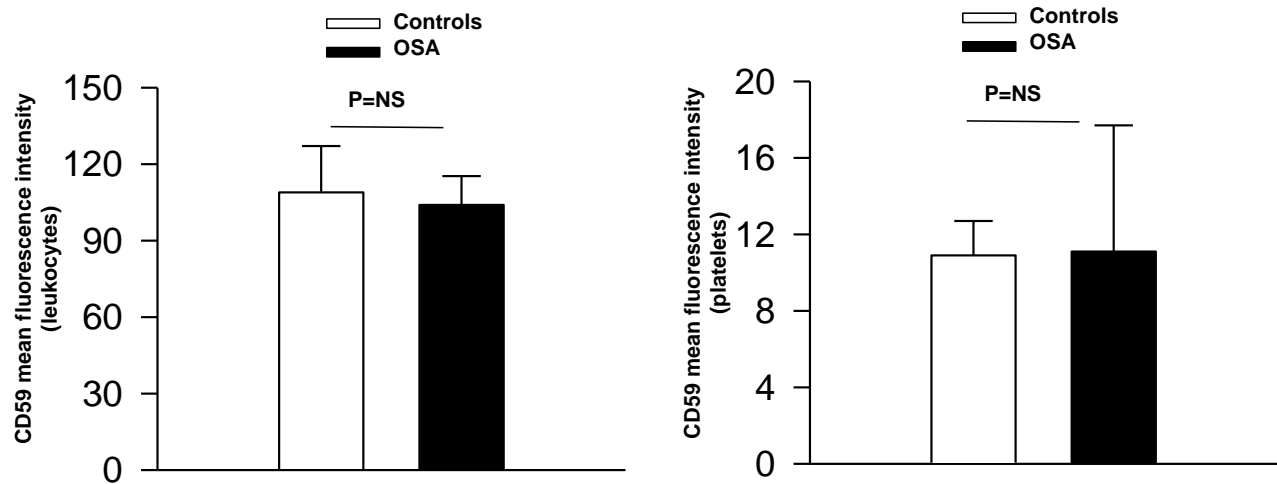

**Fig. S1. Expression of CD59 in leukocytes and platelets.** Bar graphs quantitate the expression of CD59 in unpermeabilized leukocytes and platelets of OSA patients (n=7) and controls (n=7) (flow cytometry, mean  $\pm$  SE, 2-sided Exact permutation test). NS=not significant.

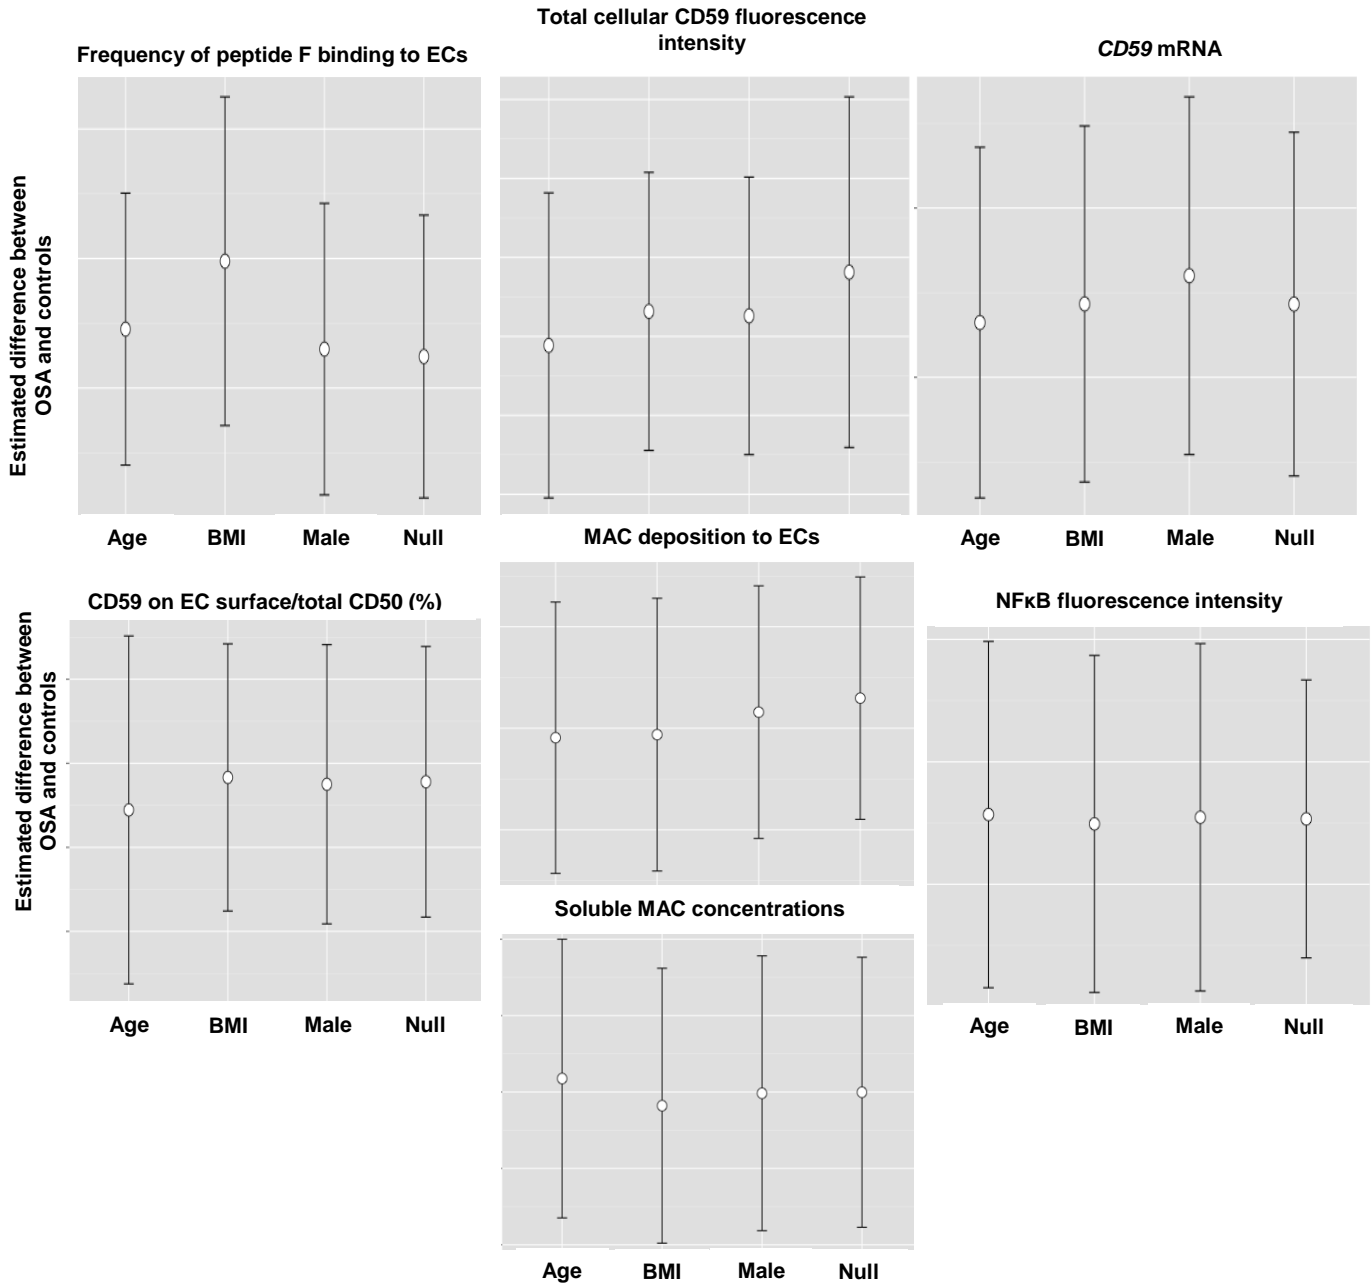

**Fig. S2. Linear regression analysis.** The graphs show estimated differences in measured variables between OSA patients and controls and their 95% confidence intervals from the following 4 models: null = model without adjustment for confounders; age = model adjusted for age; BMI = model adjusted for BMI; male = model adjusted for gender.

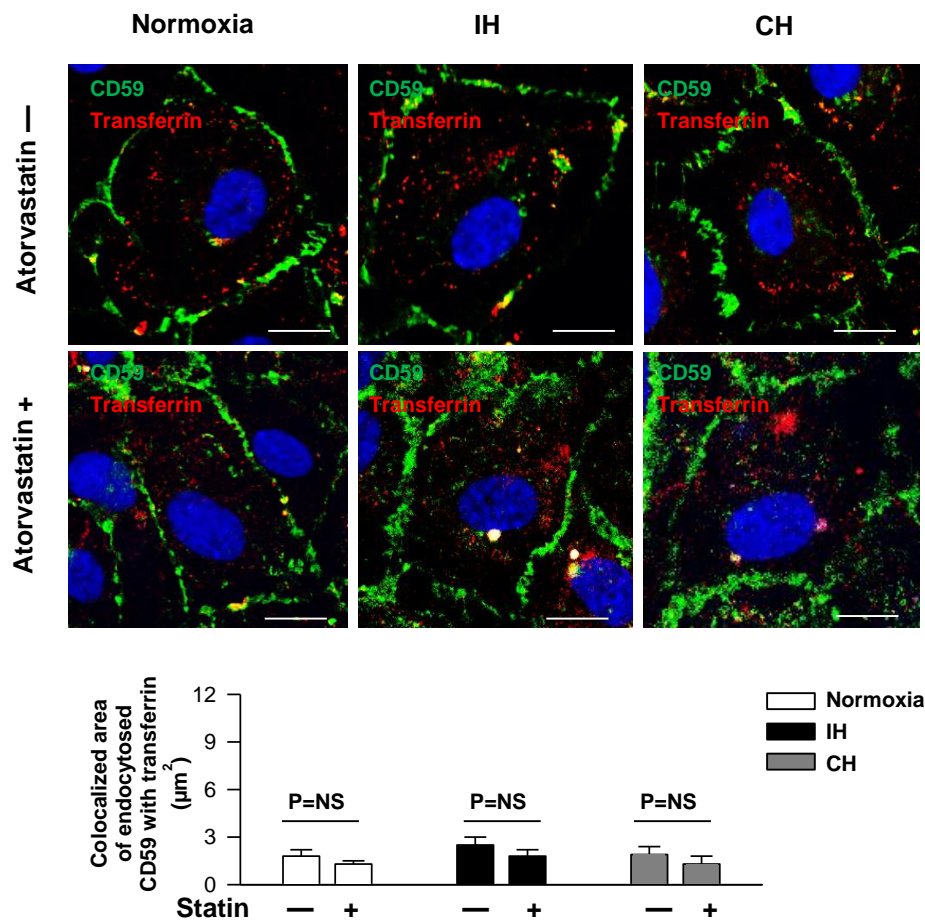

**Fig S3. Endocytosis of CD59 with transferrin.** Representative confocal images of CD59 endocytosis in HUVECs in normoxia, intermittent hypoxia (IH), or continuous hypoxia (CH) with or without atorvastatin (n=4). Scale bar 10  $\mu\text{m}$ . Bar graph quantitates colocalized area of endocytosed CD59 with transferrin ( $\mu\text{m}^2$ ). All data throughout the figure are shown as the mean  $\pm$  SE, 2-sided Exact permutation test.

CH = Continuous Hypoxia; HUVEC = Human Umbilical Vein Endothelial Cells; IH = Intermittent Hypoxia. NS=not significant.

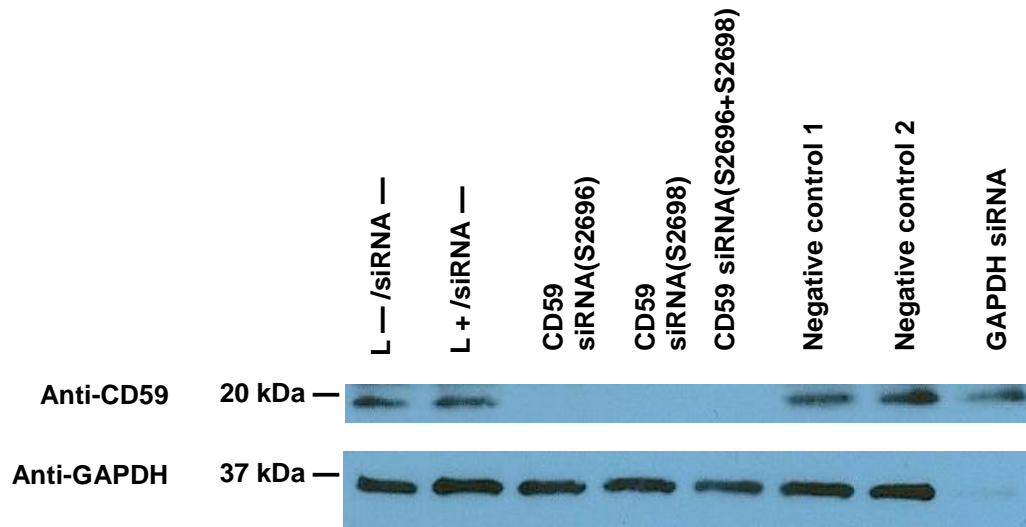

**Fig S4. Confirmation of HUVEC transfection with CD59 siRNA.** Western blots probed with antibodies directed against CD59 and glyceraldehyde 3-phosphate dehydrogenase (GAPDH). Transfection of HUVECs was carried out for 48 hours using lipofectamine (L) and siRNAs s2696, s2698, and a combination of s2696 and s2698 to knock down CD59. Two scrambled siRNAs served as a negative control, and siRNA against GAPDH served as a positive control (n=3). The expression of CD59 was almost completely knocked down by either siRNA (s2696 or s2698).

GAPDH = glyceraldehyde 3-phosphate dehydrogenase; HUVEC = Human Umbilical Vein Endothelial Cells.

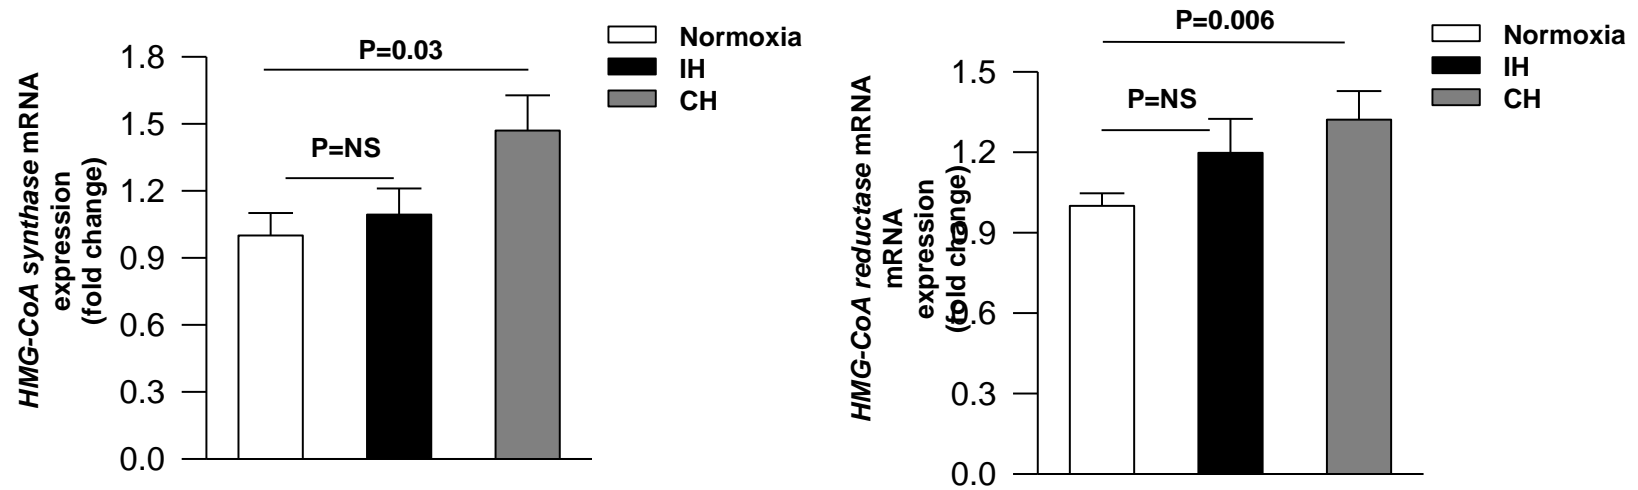

**Fig S5. Cholesterol biosynthesis in IH.** Quantitation of the *3-hydroxy-3-methylglutaryl-coenzyme A (HMG-CoA) reductase* and *synthase* mRNA expression in HUVECs in normoxia, intermittent hypoxia (IH), and continuous hypoxia (CH) expressed as fold change over normoxia (n=4). All data throughout the figure are shown as the mean  $\pm$  SE, 2-sided Exact permutation test. CH = Continuous Hypoxia; HUVEC = Human Umbilical Vein Endothelial Cells; IH = Intermittent Hypoxia; NS=not significant.

**Table. S1. Baseline characteristics of patients with OSA and control subjects.**

|                                                                 | <b>OSA patients</b><br>(n=76) | <b>Control subjects</b><br>(n=52) | <b>p value</b> |
|-----------------------------------------------------------------|-------------------------------|-----------------------------------|----------------|
| <b>Age</b> (years)                                              | 45±1.6                        | 39±1.6                            | 0.01           |
| <b>Body mass index</b> (kg/m <sup>2</sup> )                     | 37±1.0                        | 34±1.4                            | NS             |
| <b>Apnea-hypopnea index</b> (events/hour of sleep)              | 26±2.6                        | 1.6±0.2                           | <0.001         |
| <b>Oxygen Desaturation Index</b> (events/hour of sleep)         | 16±2.8                        | 1.0±0.2                           | <0.001         |
| <b>Epworth sleepiness scale score</b>                           | 11±0.7                        | 9±0.8                             | NS             |
| <b>Systolic blood pressure</b> (mmHg)                           | 121±2.1                       | 123±2.3                           | NS             |
| <b>Diastolic blood pressure</b> (mmHg)                          | 77±1.3                        | 77±1.5                            | NS             |
| Data are presented as mean ± SE                                 |                               |                                   |                |
|                                                                 | <b>OSA patients</b><br>(n=76) | <b>Control subjects</b><br>(n=52) | <b>p value</b> |
| <b>Gender</b> (% female)                                        | 50                            | 51                                | NS             |
| <b>SaO<sub>2</sub> nadir</b> (%)                                | 85±0.8                        | 91±0.8                            | <0.001         |
| <b>t &lt; SaO<sub>2</sub> 90%</b> (% of the total sleep time) * | 1.4±0.5                       | 0±0.0                             | <0.001         |
| <b>Hypertension, n</b> (%)                                      | 17 (22)                       | 9 (17)                            | NS             |
| <b>Dyslipidemia, n</b> (%)                                      | 10 (13)                       | 5 (10)                            | NS             |

Data are presented as %.

SaO<sub>2</sub>= arterial oxyhemoglobin saturation.

\* Time spent below SaO<sub>2</sub> of 90% during sleep.

NS= not significant.

**Table. S2. Phages isolated after panning without target cells and with bovine serum albumin in polystyrene wells.**

---

| <b>Negative template</b> |
|--------------------------|
| NWKPYPT                  |
| IVLPYPI                  |
| QFQHSHP                  |
| TPITQLL                  |
| IVLPYPI                  |
| THPPNAL                  |
| YLPLYEL                  |

---
